# Supplementary material for: Spectroscopic effects resulting from interacting singlet and triplet excited states: vibronic structure involving the O–H stretching mode in d–d absorption bands of Ni(H2O)62+
Source: Royal Society of Chemistry journal article supplement (doi:10.1039/c4dt01979b), 2014-10-03
Supplement: c4dt01979b1.pdf [file c4dt01979b1.pdf]

## Electronic supplementary information

### Spectroscopic effects resulting from interacting singlet and triplet excited states: vibronic structure involving the O-H stretching mode in d-d absorption bands of $\text{Ni}(\text{H}_2\text{O})_6^{2+}$

Christopher Dobe,<sup>a</sup> Emmanuel Gonzalez,<sup>b</sup> Philip L. W. Tregenna-Piggott,<sup>a,x</sup> Christian Reber<sup>b\*</sup>

<sup>a</sup> Departement für Chemie und Biochemie, Universität Bern, CH-3012 Bern, Switzerland

<sup>b</sup> Département de chimie, Université de Montréal, Montréal QC H3C 3J7, Canada

\* author for correspondence, christian.reber@umontreal.ca, tel. +1-514-343-7332

<sup>x</sup> Dedicated to the memory of our friend and colleague PLWTP

## Contents

**Table ESI1** Anisotropic displacement parameters ( $\text{Å}^2 \times 10^3$ ) for  $\text{CsNi}(\text{H}_2\text{O})_6\text{PO}_4$ .

**Table ESI2** Hydrogen bonds for  $\text{CsNi}(\text{H}_2\text{O})_6\text{PO}_4$  ( $\text{Å}$  and  $^\circ$ ).

**Table ESI3.** Ligand field and angular-overlap (AOM) parameters for  $\text{Ni}(\text{H}_2\text{O})_6(\text{BrO}_3)_2$  and  $\text{Cs}[\text{Ni}(\text{H}_2\text{O})_6](\text{PO}_4)$

**Table ESI1** Anisotropic displacement parameters ( $\text{\AA}^2 \times 10^3$ ) for  $\text{CsNi}(\text{H}_2\text{O})_6\text{PO}_4$ . The anisotropic displacement factor exponent takes the form:  $-2\pi^2(h^2 a^{*2}U^{11} + \dots + 2 h k a^* b^* U^{12})$ .

|      | $U^{11}$ | $U^{22}$ | $U^{33}$ | $U^{23}$ | $U^{13}$ | $U^{12}$ |
|------|----------|----------|----------|----------|----------|----------|
| O(1) | 31(2)    | 77(2)    | 77(2)    | -44(3)   | 0        | 0        |
| O(2) | 32(1)    | 32(1)    | 32(1)    | -4(1)    | -4(1)    | -4(1)    |

**Table ESI2** Hydrogen bonds for  $\text{CsNi}(\text{H}_2\text{O})_6\text{PO}_4$  ( $\text{\AA}$  and  $^\circ$ ).

| D-H...A       | d(D-H)  | d(H...A) | d(D...A) | D-H-A  |
|---------------|---------|----------|----------|--------|
| O(1)-H...O(2) | 0.72(5) | 1.93(4)  | 2.644(2) | 174(6) |

**Table ESI3.** Ligand field and angular-overlap (AOM) parameters for Ni(BrO<sub>3</sub>)<sub>2</sub>·6H<sub>2</sub>O and Cs[Ni(H<sub>2</sub>O)<sub>6</sub>](PO<sub>4</sub>)

| Parameter                                            | [Ni(H <sub>2</sub> O) <sub>6</sub> ](BrO <sub>3</sub> ) <sub>2</sub> | Cs[Ni(H <sub>2</sub> O) <sub>6</sub> ](PO <sub>4</sub> ) |
|------------------------------------------------------|----------------------------------------------------------------------|----------------------------------------------------------|
| B (cm <sup>-1</sup> )                                | 950                                                                  | 950                                                      |
| C (cm <sup>-1</sup> )                                | 3800                                                                 | 3800                                                     |
| Dq                                                   | 6665                                                                 | 6330                                                     |
| e <sub>σ</sub> (cm <sup>-1</sup> )                   | 3520                                                                 | 3482                                                     |
| e <sub>π</sub> (cm <sup>-1</sup> )                   | 974                                                                  | 1029                                                     |
| <sup>1</sup> E <sub>g</sub>                          | 14622                                                                | 14608                                                    |
| <sup>3</sup> T <sub>1g</sub> ( <sup>3</sup> F)       | 14343                                                                | 14005                                                    |
| ζ (cm <sup>-1</sup> ) (ζ=-2 λ for Ni <sup>2+</sup> ) | 600                                                                  | 600                                                      |
| E <sub>g</sub> ( <sup>1</sup> E <sub>g</sub> )       | 15618                                                                | 15445                                                    |
| E <sub>g</sub> ( <sup>3</sup> T <sub>1g</sub> )      | 14054                                                                | 13884                                                    |
| A <sub>1g</sub> ( <sup>3</sup> T <sub>1g</sub> )     | 13632                                                                | 13289                                                    |
| T <sub>1g</sub> ( <sup>3</sup> T <sub>1g</sub> )     | 14104                                                                | 13765                                                    |
| T <sub>2g</sub> ( <sup>3</sup> T <sub>1g</sub> )     | 14850                                                                | 14519                                                    |
